# Supplementary material
Source: publisher site journal article supplement (https://www.spandidos-publications.com/3358/downloadSupplementary)
Supplement: Supplementary file 1 [file downloadSupplementary]

## Sheet: KIRC
Tabel SⅢ. The genes relevant to RCC which retrieved through the DisGeNET database with scores higher than 0.3 were selected for subsequent analyses.
#LncRNA ID	#LncRNA Symbol	#TF ID	#TF Symbol	#Gene ID	#Gene Symbol	#Correlation coefficient in lncRNA low expression group	#Correlation coefficient in lncRNA high expression group	#score	#p_value	#FDR	#LncRNA Modulators	#The Fisher transformation of correlation coefficient in lncRNA low expression group	#The Fisher transformation of correlation coefficient in lncRNA high expression group	#LncRNA Type	#Cancer	#The probability in discovery set	#The probability in validation set
ENSG00000251562	MALAT1	ENSG00000028277	POU2F2	ENSG00000102901	CENPT	-0.157	0.413	1	0	0	- +	-0.158	0.44	pan	LGG,GBM,KICH,KIRC,KIRP,BLCA,PRAD,LUAD,LUSC,COAD,READ,STAD,LIHC,CESC,OV,UCEC,BRCA,SKCM,HNSC,THCA	0.00173	0.00203
ENSG00000251562	MALAT1	ENSG00000028277	POU2F2	ENSG00000102904	TSNAXIP1	-0.0661	0.476	1	0	0	- +	-0.0662	0.518	pan	LGG,GBM,KICH,KIRC,KIRP,BLCA,PRAD,LUAD,LUSC,COAD,READ,STAD,LIHC,CESC,OV,UCEC,BRCA,SKCM,HNSC,THCA	0.00886	0.00695
ENSG00000251562	MALAT1	ENSG00000028277	POU2F2	ENSG00000108465	CDK5RAP3	-0.0231	0.489	1	0	0	- +	-0.0231	0.534	pan	LGG,GBM,KICH,KIRC,KIRP,BLCA,PRAD,LUAD,LUSC,COAD,READ,STAD,LIHC,CESC,OV,UCEC,BRCA,SKCM,HNSC,THCA	0.000638	0.00508
ENSG00000251562	MALAT1	ENSG00000028277	POU2F2	ENSG00000139631	CSAD	-0.0246	0.453	1	0	0	- +	-0.0246	0.488	pan	LGG,GBM,KICH,KIRC,KIRP,BLCA,PRAD,LUAD,LUSC,COAD,READ,STAD,LIHC,CESC,OV,UCEC,BRCA,SKCM,HNSC,THCA	0.000668	0.0308
ENSG00000251562	MALAT1	ENSG00000028277	POU2F2	ENSG00000144134	RABL2A	-0.0778	0.406	1	0	0	- +	-0.078	0.431	pan	LGG,GBM,KICH,KIRC,KIRP,BLCA,PRAD,LUAD,LUSC,COAD,READ,STAD,LIHC,CESC,OV,UCEC,BRCA,SKCM,HNSC,THCA	0.0225	0.034
ENSG00000251562	MALAT1	ENSG00000028277	POU2F2	ENSG00000158062	UBXN11	0.0514	0.547	1	0	0	+ ++	0.0514	0.614	pan	LGG,GBM,KICH,KIRC,KIRP,BLCA,PRAD,LUAD,LUSC,COAD,READ,STAD,LIHC,CESC,OV,UCEC,BRCA,SKCM,HNSC,THCA	0.00833	0.00792
ENSG00000251562	MALAT1	ENSG00000028277	POU2F2	ENSG00000163617	CCDC191	-0.055	0.489	1	0	0	- +	-0.0551	0.535	pan	LGG,GBM,KICH,KIRC,KIRP,BLCA,PRAD,LUAD,LUSC,COAD,READ,STAD,LIHC,CESC,OV,UCEC,BRCA,SKCM,HNSC,THCA	0.022	0.0404
ENSG00000251562	MALAT1	ENSG00000028277	POU2F2	ENSG00000198556	ZNF789	0.0108	0.468	1	0	0	+ ++	0.0108	0.507	pan	LGG,GBM,KICH,KIRC,KIRP,BLCA,PRAD,LUAD,LUSC,COAD,READ,STAD,LIHC,CESC,OV,UCEC,BRCA,SKCM,HNSC,THCA	0.00602	0.0163
ENSG00000251562	MALAT1	ENSG00000069399	BCL3	ENSG00000099326	MZF1	0.0753	0.527	1	0	0	+ ++	0.0755	0.586	pan	LGG,GBM,KICH,KIRC,KIRP,BLCA,PRAD,LUAD,LUSC,COAD,READ,STAD,LIHC,CESC,OV,UCEC,BRCA,SKCM,HNSC,THCA	8.66e-06	0.00089
ENSG00000251562	MALAT1	ENSG00000069399	BCL3	ENSG00000100918	REC8	0.0974	0.593	1	0	0	+ ++	0.0977	0.683	pan	LGG,GBM,KICH,KIRC,KIRP,BLCA,PRAD,LUAD,LUSC,COAD,READ,STAD,LIHC,CESC,OV,UCEC,BRCA,SKCM,HNSC,THCA	9.88e-05	0.000184
ENSG00000251562	MALAT1	ENSG00000069399	BCL3	ENSG00000198198	SZT2	-0.0596	0.467	1	0	0	- +	-0.0597	0.506	pan	LGG,GBM,KICH,KIRC,KIRP,BLCA,PRAD,LUAD,LUSC,COAD,READ,STAD,LIHC,CESC,OV,UCEC,BRCA,SKCM,HNSC,THCA	1.53e-05	3.23e-05
ENSG00000251562	MALAT1	ENSG00000069399	BCL3	ENSG00000215375	MYL5	-0.0403	0.417	0.999	0	0	- +	-0.0403	0.444	pan	LGG,GBM,KICH,KIRC,KIRP,BLCA,PRAD,LUAD,LUSC,COAD,READ,STAD,LIHC,CESC,OV,UCEC,BRCA,SKCM,HNSC,THCA	6.88e-06	6.82e-05
ENSG00000251562	MALAT1	ENSG00000075426	FOSL2	ENSG00000104885	DOT1L	0.51	0.0086	1	0	0	++ +	0.562	0.0086	pan	LGG,GBM,KICH,KIRC,KIRP,BLCA,PRAD,LUAD,LUSC,COAD,READ,STAD,LIHC,CESC,OV,UCEC,BRCA,SKCM,HNSC,THCA	0.0518	0.133
ENSG00000251562	MALAT1	ENSG00000075426	FOSL2	ENSG00000167978	SRRM2	0.441	-0.00964	0.999	0	0	+ -	0.474	-0.00964	pan	LGG,GBM,KICH,KIRC,KIRP,BLCA,PRAD,LUAD,LUSC,COAD,READ,STAD,LIHC,CESC,OV,UCEC,BRCA,SKCM,HNSC,THCA	0.00894	0.333
ENSG00000251562	MALAT1	ENSG00000077463	SIRT6	ENSG00000137185	ZSCAN9	0.176	0.673	1	0	0	+ ++	0.178	0.817	pan	LGG,GBM,KICH,KIRC,KIRP,BLCA,PRAD,LUAD,LUSC,COAD,READ,STAD,LIHC,CESC,OV,UCEC,BRCA,SKCM,HNSC,THCA	0.177	0.0223
ENSG00000251562	MALAT1	ENSG00000077463	SIRT6	ENSG00000161180	CCDC116	0.0273	0.511	1	0	0	+ ++	0.0273	0.564	pan	LGG,GBM,KICH,KIRC,KIRP,BLCA,PRAD,LUAD,LUSC,COAD,READ,STAD,LIHC,CESC,OV,UCEC,BRCA,SKCM,HNSC,THCA	0.119	0.00616
ENSG00000251562	MALAT1	ENSG00000077463	SIRT6	ENSG00000175564	UCP3	0.161	0.625	1	0	0	+ ++	0.163	0.733	pan	LGG,GBM,KICH,KIRC,KIRP,BLCA,PRAD,LUAD,LUSC,COAD,READ,STAD,LIHC,CESC,OV,UCEC,BRCA,SKCM,HNSC,THCA	0.134	0.0364
ENSG00000251562	MALAT1	ENSG00000084093	REST	ENSG00000010295	IFFO1	-0.101	-0.617	1	0	0	- --	-0.101	-0.721	pan	LGG,GBM,KICH,KIRC,KIRP,BLCA,PRAD,LUAD,LUSC,COAD,READ,STAD,LIHC,CESC,OV,UCEC,BRCA,SKCM,HNSC,THCA	0.000774	0.000465
ENSG00000251562	MALAT1	ENSG00000084093	REST	ENSG00000079134	THOC1	-0.156	-0.686	1	0	0	- --	-0.157	-0.84	pan	LGG,GBM,KICH,KIRC,KIRP,BLCA,PRAD,LUAD,LUSC,COAD,READ,STAD,LIHC,CESC,OV,UCEC,BRCA,SKCM,HNSC,THCA	0.0344	0.039
ENSG00000251562	MALAT1	ENSG00000084093	REST	ENSG00000079313	REXO1	-0.168	-0.708	1	0	0	- --	-0.169	-0.884	pan	LGG,GBM,KICH,KIRC,KIRP,BLCA,PRAD,LUAD,LUSC,COAD,READ,STAD,LIHC,CESC,OV,UCEC,BRCA,SKCM,HNSC,THCA	0.0214	0.00671
ENSG00000251562	MALAT1	ENSG00000084093	REST	ENSG00000080823	MOK	0.00898	-0.559	1	0	0	+ -	0.00898	-0.631	pan	LGG,GBM,KICH,KIRC,KIRP,BLCA,PRAD,LUAD,LUSC,COAD,READ,STAD,LIHC,CESC,OV,UCEC,BRCA,SKCM,HNSC,THCA	0.0313	0.00408
ENSG00000251562	MALAT1	ENSG00000084093	REST	ENSG00000088305	DNMT3B	-0.059	-0.525	1	0	0	- --	-0.0591	-0.583	pan	LGG,GBM,KICH,KIRC,KIRP,BLCA,PRAD,LUAD,LUSC,COAD,READ,STAD,LIHC,CESC,OV,UCEC,BRCA,SKCM,HNSC,THCA	0.0067	0.00378
ENSG00000251562	MALAT1	ENSG00000084093	REST	ENSG00000088448	ANKRD10	0.0309	-0.632	1	0	0	+ -	0.0309	-0.744	pan	LGG,GBM,KICH,KIRC,KIRP,BLCA,PRAD,LUAD,LUSC,COAD,READ,STAD,LIHC,CESC,OV,UCEC,BRCA,SKCM,HNSC,THCA	0.0651	0.00483
ENSG00000251562	MALAT1	ENSG00000084093	REST	ENSG00000089820	ARHGAP4	-0.0172	-0.472	1	0	0	- --	-0.0172	-0.513	pan	LGG,GBM,KICH,KIRC,KIRP,BLCA,PRAD,LUAD,LUSC,COAD,READ,STAD,LIHC,CESC,OV,UCEC,BRCA,SKCM,HNSC,THCA	0.00097	0.00142
ENSG00000251562	MALAT1	ENSG00000084093	REST	ENSG00000089847	ANKRD24	-0.0242	-0.534	1	0	0	- --	-0.0242	-0.596	pan	LGG,GBM,KICH,KIRC,KIRP,BLCA,PRAD,LUAD,LUSC,COAD,READ,STAD,LIHC,CESC,OV,UCEC,BRCA,SKCM,HNSC,THCA	0.0469	0.0441
ENSG00000251562	MALAT1	ENSG00000084093	REST	ENSG00000099326	MZF1	-0.0695	-0.598	1	0	0	- --	-0.0697	-0.691	pan	LGG,GBM,KICH,KIRC,KIRP,BLCA,PRAD,LUAD,LUSC,COAD,READ,STAD,LIHC,CESC,OV,UCEC,BRCA,SKCM,HNSC,THCA	0.0322	0.0249
ENSG00000251562	MALAT1	ENSG00000084093	REST	ENSG00000100038	TOP3B	-0.131	-0.587	1	0	0	- --	-0.132	-0.673	pan	LGG,GBM,KICH,KIRC,KIRP,BLCA,PRAD,LUAD,LUSC,COAD,READ,STAD,LIHC,CESC,OV,UCEC,BRCA,SKCM,HNSC,THCA	0.175	0.0242
ENSG00000251562	MALAT1	ENSG00000084093	REST	ENSG00000102904	TSNAXIP1	-0.00353	-0.482	1	0	0	- --	-0.00353	-0.525	pan	LGG,GBM,KICH,KIRC,KIRP,BLCA,PRAD,LUAD,LUSC,COAD,READ,STAD,LIHC,CESC,OV,UCEC,BRCA,SKCM,HNSC,THCA	0.106	0.0474
ENSG00000251562	MALAT1	ENSG00000084093	REST	ENSG00000103168	TAF1C	-0.097	-0.692	1	0	0	- --	-0.0973	-0.852	pan	LGG,GBM,KICH,KIRC,KIRP,BLCA,PRAD,LUAD,LUSC,COAD,READ,STAD,LIHC,CESC,OV,UCEC,BRCA,SKCM,HNSC,THCA	0.0114	0.00394
ENSG00000251562	MALAT1	ENSG00000084093	REST	ENSG00000108848	LUC7L3	-0.162	-0.642	1	0	0	- --	-0.163	-0.762	pan	LGG,GBM,KICH,KIRC,KIRP,BLCA,PRAD,LUAD,LUSC,COAD,READ,STAD,LIHC,CESC,OV,UCEC,BRCA,SKCM,HNSC,THCA	0.0118	0.0073
ENSG00000251562	MALAT1	ENSG00000084093	REST	ENSG00000116819	TFAP2E	-0.0328	-0.526	1	0	0	- --	-0.0328	-0.585	pan	LGG,GBM,KICH,KIRC,KIRP,BLCA,PRAD,LUAD,LUSC,COAD,READ,STAD,LIHC,CESC,OV,UCEC,BRCA,SKCM,HNSC,THCA	0.000225	0.00181
ENSG00000251562	MALAT1	ENSG00000084093	REST	ENSG00000119778	ATAD2B	0.553	0.0326	1	0	0	++ +	0.623	0.0326	pan	LGG,GBM,KICH,KIRC,KIRP,BLCA,PRAD,LUAD,LUSC,COAD,READ,STAD,LIHC,CESC,OV,UCEC,BRCA,SKCM,HNSC,THCA	0.0101	0.00103
ENSG00000251562	MALAT1	ENSG00000084093	REST	ENSG00000120458	MSANTD2	-0.129	-0.651	1	0	0	- --	-0.13	-0.777	pan	LGG,GBM,KICH,KIRC,KIRP,BLCA,PRAD,LUAD,LUSC,COAD,READ,STAD,LIHC,CESC,OV,UCEC,BRCA,SKCM,HNSC,THCA	0.116	0.00549
ENSG00000251562	MALAT1	ENSG00000084093	REST	ENSG00000125503	PPP1R12C	-0.181	-0.697	1	0	0	- --	-0.183	-0.862	pan	LGG,GBM,KICH,KIRC,KIRP,BLCA,PRAD,LUAD,LUSC,COAD,READ,STAD,LIHC,CESC,OV,UCEC,BRCA,SKCM,HNSC,THCA	0.0622	0.0326
ENSG00000251562	MALAT1	ENSG00000084093	REST	ENSG00000130684	ZNF337	-0.0402	-0.612	1	0	0	- --	-0.0402	-0.712	pan	LGG,GBM,KICH,KIRC,KIRP,BLCA,PRAD,LUAD,LUSC,COAD,READ,STAD,LIHC,CESC,OV,UCEC,BRCA,SKCM,HNSC,THCA	0.0045	0.00138
ENSG00000251562	MALAT1	ENSG00000084093	REST	ENSG00000130856	ZNF236	0.653	0.103	1	0	0	++ +	0.78	0.104	pan	LGG,GBM,KICH,KIRC,KIRP,BLCA,PRAD,LUAD,LUSC,COAD,READ,STAD,LIHC,CESC,OV,UCEC,BRCA,SKCM,HNSC,THCA	0.00634	0.0571
ENSG00000251562	MALAT1	ENSG00000084093	REST	ENSG00000132740	IGHMBP2	0.0428	-0.532	1	0	0	+ -	0.0428	-0.593	pan	LGG,GBM,KICH,KIRC,KIRP,BLCA,PRAD,LUAD,LUSC,COAD,READ,STAD,LIHC,CESC,OV,UCEC,BRCA,SKCM,HNSC,THCA	0.029	0.0103
ENSG00000251562	MALAT1	ENSG00000084093	REST	ENSG00000132780	NASP	-0.0676	-0.637	1	0	0	- --	-0.0677	-0.754	pan	LGG,GBM,KICH,KIRC,KIRP,BLCA,PRAD,LUAD,LUSC,COAD,READ,STAD,LIHC,CESC,OV,UCEC,BRCA,SKCM,HNSC,THCA	0.0254	0.00505
ENSG00000251562	MALAT1	ENSG00000084093	REST	ENSG00000137185	ZSCAN9	-0.0879	-0.595	1	0	0	- --	-0.0881	-0.686	pan	LGG,GBM,KICH,KIRC,KIRP,BLCA,PRAD,LUAD,LUSC,COAD,READ,STAD,LIHC,CESC,OV,UCEC,BRCA,SKCM,HNSC,THCA	0.0962	0.00671
ENSG00000251562	MALAT1	ENSG00000084093	REST	ENSG00000137218	FRS3	-0.123	-0.7	1	0	0	- --	-0.124	-0.867	pan	LGG,GBM,KICH,KIRC,KIRP,BLCA,PRAD,LUAD,LUSC,COAD,READ,STAD,LIHC,CESC,OV,UCEC,BRCA,SKCM,HNSC,THCA	0.125	0.00306
ENSG00000251562	MALAT1	ENSG00000084093	REST	ENSG00000139574	NPFF	-0.182	-0.743	1	0	0	- --	-0.184	-0.957	pan	LGG,GBM,KICH,KIRC,KIRP,BLCA,PRAD,LUAD,LUSC,COAD,READ,STAD,LIHC,CESC,OV,UCEC,BRCA,SKCM,HNSC,THCA	0.00759	0.000813
ENSG00000251562	MALAT1	ENSG00000084093	REST	ENSG00000139631	CSAD	-0.127	-0.657	1	0	0	- --	-0.127	-0.787	pan	LGG,GBM,KICH,KIRC,KIRP,BLCA,PRAD,LUAD,LUSC,COAD,READ,STAD,LIHC,CESC,OV,UCEC,BRCA,SKCM,HNSC,THCA	0.0353	0.031
ENSG00000251562	MALAT1	ENSG00000084093	REST	ENSG00000139636	LMBR1L	-0.172	-0.679	1	0	0	- --	-0.174	-0.827	pan	LGG,GBM,KICH,KIRC,KIRP,BLCA,PRAD,LUAD,LUSC,COAD,READ,STAD,LIHC,CESC,OV,UCEC,BRCA,SKCM,HNSC,THCA	0.01	9.49e-05
ENSG00000251562	MALAT1	ENSG00000084093	REST	ENSG00000139890	REM2	-0.17	-0.633	1	0	0	- --	-0.172	-0.747	pan	LGG,GBM,KICH,KIRC,KIRP,BLCA,PRAD,LUAD,LUSC,COAD,READ,STAD,LIHC,CESC,OV,UCEC,BRCA,SKCM,HNSC,THCA	0.00979	0.000138
ENSG00000251562	MALAT1	ENSG00000084093	REST	ENSG00000140400	MAN2C1	-0.0825	-0.589	1	0	0	- --	-0.0827	-0.675	pan	LGG,GBM,KICH,KIRC,KIRP,BLCA,PRAD,LUAD,LUSC,COAD,READ,STAD,LIHC,CESC,OV,UCEC,BRCA,SKCM,HNSC,THCA	0.0275	0.0451
ENSG00000251562	MALAT1	ENSG00000084093	REST	ENSG00000144134	RABL2A	-0.0744	-0.539	1	0	0	- --	-0.0746	-0.603	pan	LGG,GBM,KICH,KIRC,KIRP,BLCA,PRAD,LUAD,LUSC,COAD,READ,STAD,LIHC,CESC,OV,UCEC,BRCA,SKCM,HNSC,THCA	0.124	0.059
ENSG00000251562	MALAT1	ENSG00000084093	REST	ENSG00000146067	FAM193B	-0.192	-0.706	1	0	0	- --	-0.195	-0.879	pan	LGG,GBM,KICH,KIRC,KIRP,BLCA,PRAD,LUAD,LUSC,COAD,READ,STAD,LIHC,CESC,OV,UCEC,BRCA,SKCM,HNSC,THCA	0.0359	0.00582
ENSG00000251562	MALAT1	ENSG00000084093	REST	ENSG00000149311	ATM	0.683	0.177	1	0	0	++ +	0.834	0.179	pan	LGG,GBM,KICH,KIRC,KIRP,BLCA,PRAD,LUAD,LUSC,COAD,READ,STAD,LIHC,CESC,OV,UCEC,BRCA,SKCM,HNSC,THCA	0.0312	0.0191
ENSG00000251562	MALAT1	ENSG00000084093	REST	ENSG00000149716	ORAOV1	-0.129	-0.642	1	0	0	- --	-0.129	-0.761	pan	LGG,GBM,KICH,KIRC,KIRP,BLCA,PRAD,LUAD,LUSC,COAD,READ,STAD,LIHC,CESC,OV,UCEC,BRCA,SKCM,HNSC,THCA	0.0473	0.0746
ENSG00000251562	MALAT1	ENSG00000084093	REST	ENSG00000158286	RNF207	-0.105	-0.557	1	0	0	- --	-0.106	-0.629	pan	LGG,GBM,KICH,KIRC,KIRP,BLCA,PRAD,LUAD,LUSC,COAD,READ,STAD,LIHC,CESC,OV,UCEC,BRCA,SKCM,HNSC,THCA	0.141	0.0368
ENSG00000251562	MALAT1	ENSG00000084093	REST	ENSG00000158805	ZNF276	-0.0405	-0.668	1	0	0	- --	-0.0406	-0.807	pan	LGG,GBM,KICH,KIRC,KIRP,BLCA,PRAD,LUAD,LUSC,COAD,READ,STAD,LIHC,CESC,OV,UCEC,BRCA,SKCM,HNSC,THCA	0.05	0.0326
ENSG00000251562	MALAT1	ENSG00000084093	REST	ENSG00000158863	FAM160B2	0.0131	-0.562	1	0	0	+ -	0.0131	-0.635	pan	LGG,GBM,KICH,KIRC,KIRP,BLCA,PRAD,LUAD,LUSC,COAD,READ,STAD,LIHC,CESC,OV,UCEC,BRCA,SKCM,HNSC,THCA	0.03	0.000741
ENSG00000251562	MALAT1	ENSG00000084093	REST	ENSG00000163516	ANKZF1	-0.0786	-0.556	1	0	0	- --	-0.0787	-0.628	pan	LGG,GBM,KICH,KIRC,KIRP,BLCA,PRAD,LUAD,LUSC,COAD,READ,STAD,LIHC,CESC,OV,UCEC,BRCA,SKCM,HNSC,THCA	0.0419	0.0474
ENSG00000251562	MALAT1	ENSG00000084093	REST	ENSG00000168026	TTC21A	0.105	-0.537	1	0	0	+ -	0.105	-0.6	pan	LGG,GBM,KICH,KIRC,KIRP,BLCA,PRAD,LUAD,LUSC,COAD,READ,STAD,LIHC,CESC,OV,UCEC,BRCA,SKCM,HNSC,THCA	0.0989	0.0032
ENSG00000251562	MALAT1	ENSG00000084093	REST	ENSG00000171045	TSNARE1	-0.103	-0.563	1	0	0	- --	-0.103	-0.637	pan	LGG,GBM,KICH,KIRC,KIRP,BLCA,PRAD,LUAD,LUSC,COAD,READ,STAD,LIHC,CESC,OV,UCEC,BRCA,SKCM,HNSC,THCA	0.0145	0.0171
ENSG00000251562	MALAT1	ENSG00000084093	REST	ENSG00000173338	KCNK7	-0.0765	-0.536	1	0	0	- --	-0.0766	-0.599	pan	LGG,GBM,KICH,KIRC,KIRP,BLCA,PRAD,LUAD,LUSC,COAD,READ,STAD,LIHC,CESC,OV,UCEC,BRCA,SKCM,HNSC,THCA	0.0813	0.00807
ENSG00000251562	MALAT1	ENSG00000084093	REST	ENSG00000174799	CEP135	0.483	0.00214	1	0	0	++ +	0.527	0.00214	pan	LGG,GBM,KICH,KIRC,KIRP,BLCA,PRAD,LUAD,LUSC,COAD,READ,STAD,LIHC,CESC,OV,UCEC,BRCA,SKCM,HNSC,THCA	0.0107	0.0022
ENSG00000251562	MALAT1	ENSG00000084093	REST	ENSG00000176155	CCDC57	-0.138	-0.59	1	0	0	- --	-0.139	-0.677	pan	LGG,GBM,KICH,KIRC,KIRP,BLCA,PRAD,LUAD,LUSC,COAD,READ,STAD,LIHC,CESC,OV,UCEC,BRCA,SKCM,HNSC,THCA	0.0183	0.0127
ENSG00000251562	MALAT1	ENSG00000084093	REST	ENSG00000177595	PIDD1	-0.172	-0.647	1	0	0	- --	-0.174	-0.769	pan	LGG,GBM,KICH,KIRC,KIRP,BLCA,PRAD,LUAD,LUSC,COAD,READ,STAD,LIHC,CESC,OV,UCEC,BRCA,SKCM,HNSC,THCA	0.00437	0.0291
ENSG00000251562	MALAT1	ENSG00000084093	REST	ENSG00000184381	PLA2G6	-0.0826	-0.623	1	0	0	- --	-0.0827	-0.73	pan	LGG,GBM,KICH,KIRC,KIRP,BLCA,PRAD,LUAD,LUSC,COAD,READ,STAD,LIHC,CESC,OV,UCEC,BRCA,SKCM,HNSC,THCA	0.109	0.0062
ENSG00000251562	MALAT1	ENSG00000084093	REST	ENSG00000184677	ZBTB40	0.642	0.0971	1	0	0	++ +	0.761	0.0974	pan	LGG,GBM,KICH,KIRC,KIRP,BLCA,PRAD,LUAD,LUSC,COAD,READ,STAD,LIHC,CESC,OV,UCEC,BRCA,SKCM,HNSC,THCA	0.0179	0.00291
ENSG00000251562	MALAT1	ENSG00000084093	REST	ENSG00000185163	DDX51	-0.0801	-0.639	1	0	0	- --	-0.0802	-0.756	pan	LGG,GBM,KICH,KIRC,KIRP,BLCA,PRAD,LUAD,LUSC,COAD,READ,STAD,LIHC,CESC,OV,UCEC,BRCA,SKCM,HNSC,THCA	0.0199	0.0273
ENSG00000251562	MALAT1	ENSG00000084093	REST	ENSG00000197124	ZNF682	0.00949	-0.598	1	0	0	+ -	0.00949	-0.691	pan	LGG,GBM,KICH,KIRC,KIRP,BLCA,PRAD,LUAD,LUSC,COAD,READ,STAD,LIHC,CESC,OV,UCEC,BRCA,SKCM,HNSC,THCA	0.012	0.0155
ENSG00000251562	MALAT1	ENSG00000084093	REST	ENSG00000198026	ZNF335	0.00533	-0.601	1	0	0	+ -	0.00533	-0.694	pan	LGG,GBM,KICH,KIRC,KIRP,BLCA,PRAD,LUAD,LUSC,COAD,READ,STAD,LIHC,CESC,OV,UCEC,BRCA,SKCM,HNSC,THCA	0.0327	0.0136
ENSG00000251562	MALAT1	ENSG00000084093	REST	ENSG00000198089	SFI1	0.0184	-0.619	1	0	0	+ -	0.0184	-0.723	pan	LGG,GBM,KICH,KIRC,KIRP,BLCA,PRAD,LUAD,LUSC,COAD,READ,STAD,LIHC,CESC,OV,UCEC,BRCA,SKCM,HNSC,THCA	0.0811	0.116
ENSG00000251562	MALAT1	ENSG00000084093	REST	ENSG00000198393	ZNF26	-0.121	-0.621	1	0	0	- --	-0.122	-0.726	pan	LGG,GBM,KICH,KIRC,KIRP,BLCA,PRAD,LUAD,LUSC,COAD,READ,STAD,LIHC,CESC,OV,UCEC,BRCA,SKCM,HNSC,THCA	0.00813	0.00174
ENSG00000251562	MALAT1	ENSG00000084093	REST	ENSG00000198556	ZNF789	-0.172	-0.647	1	0	0	- --	-0.174	-0.771	pan	LGG,GBM,KICH,KIRC,KIRP,BLCA,PRAD,LUAD,LUSC,COAD,READ,STAD,LIHC,CESC,OV,UCEC,BRCA,SKCM,HNSC,THCA	0.0065	0.138
ENSG00000251562	MALAT1	ENSG00000084093	REST	ENSG00000204311	DFNB59	-0.0404	-0.567	1	0	0	- --	-0.0405	-0.643	pan	LGG,GBM,KICH,KIRC,KIRP,BLCA,PRAD,LUAD,LUSC,COAD,READ,STAD,LIHC,CESC,OV,UCEC,BRCA,SKCM,HNSC,THCA	0.00951	0.0133
ENSG00000251562	MALAT1	ENSG00000084093	REST	ENSG00000213999	MEF2B	-0.153	-0.631	1	0	0	- --	-0.154	-0.743	pan	LGG,GBM,KICH,KIRC,KIRP,BLCA,PRAD,LUAD,LUSC,COAD,READ,STAD,LIHC,CESC,OV,UCEC,BRCA,SKCM,HNSC,THCA	0.000151	0.0022
ENSG00000251562	MALAT1	ENSG00000084093	REST	ENSG00000241058	NSUN6	-0.107	-0.571	1	0	0	- --	-0.107	-0.649	pan	LGG,GBM,KICH,KIRC,KIRP,BLCA,PRAD,LUAD,LUSC,COAD,READ,STAD,LIHC,CESC,OV,UCEC,BRCA,SKCM,HNSC,THCA	0.0887	0.00235
ENSG00000251562	MALAT1	ENSG00000084093	REST	ENSG00000251201	TMED7-TICAM2	0.0902	0.541	1	0	0	+ ++	0.0904	0.605	pan	LGG,GBM,KICH,KIRC,KIRP,BLCA,PRAD,LUAD,LUSC,COAD,READ,STAD,LIHC,CESC,OV,UCEC,BRCA,SKCM,HNSC,THCA	0.0338	0.0142
ENSG00000251562	MALAT1	ENSG00000087510	TFAP2C	ENSG00000165269	AQP7	-0.504	-0.0324	1	0	0	-- -	-0.554	-0.0324	pan	LGG,GBM,KICH,KIRC,KIRP,BLCA,PRAD,LUAD,LUSC,COAD,READ,STAD,LIHC,CESC,OV,UCEC,BRCA,SKCM,HNSC,THCA	2.28e-07	0.000301
ENSG00000251562	MALAT1	ENSG00000101076	HNF4A	ENSG00000143882	ATP6V1C2	0.0323	-0.477	1	0	0	+ -	0.0323	-0.519	pan	LGG,GBM,KICH,KIRC,KIRP,BLCA,PRAD,LUAD,LUSC,COAD,READ,STAD,LIHC,CESC,OV,UCEC,BRCA,SKCM,HNSC,THCA	0.0013	0.00071
ENSG00000251562	MALAT1	ENSG00000101076	HNF4A	ENSG00000197635	DPP4	-0.034	0.43	1	0	0	- +	-0.034	0.46	pan	LGG,GBM,KICH,KIRC,KIRP,BLCA,PRAD,LUAD,LUSC,COAD,READ,STAD,LIHC,CESC,OV,UCEC,BRCA,SKCM,HNSC,THCA	0.00837	0.00241
ENSG00000251562	MALAT1	ENSG00000130522	JUND	ENSG00000169403	PTAFR	-0.109	-0.56	1	0	0	- --	-0.11	-0.633	pan	LGG,GBM,KICH,KIRC,KIRP,BLCA,PRAD,LUAD,LUSC,COAD,READ,STAD,LIHC,CESC,OV,UCEC,BRCA,SKCM,HNSC,THCA	0.0242	0.0337
ENSG00000251562	MALAT1	ENSG00000134954	ETS1	ENSG00000145029	NICN1	-0.00566	-0.467	1	0	0	- --	-0.00566	-0.507	pan	LGG,GBM,KICH,KIRC,KIRP,BLCA,PRAD,LUAD,LUSC,COAD,READ,STAD,LIHC,CESC,OV,UCEC,BRCA,SKCM,HNSC,THCA	0.00444	0.00356
ENSG00000251562	MALAT1	ENSG00000147133	TAF1	ENSG00000090905	TNRC6A	0.628	0.103	1	0	0	++ +	0.738	0.103	pan	LGG,GBM,KICH,KIRC,KIRP,BLCA,PRAD,LUAD,LUSC,COAD,READ,STAD,LIHC,CESC,OV,UCEC,BRCA,SKCM,HNSC,THCA	0.0158	0.0175
ENSG00000251562	MALAT1	ENSG00000147133	TAF1	ENSG00000139718	SETD1B	0.54	0.0397	1	0	0	++ +	0.604	0.0397	pan	LGG,GBM,KICH,KIRC,KIRP,BLCA,PRAD,LUAD,LUSC,COAD,READ,STAD,LIHC,CESC,OV,UCEC,BRCA,SKCM,HNSC,THCA	0.0446	0.0835
ENSG00000251562	MALAT1	ENSG00000147133	TAF1	ENSG00000272333	KMT2B	0.53	0.0658	1	0	0	++ +	0.59	0.0659	pan	LGG,GBM,KICH,KIRC,KIRP,BLCA,PRAD,LUAD,LUSC,COAD,READ,STAD,LIHC,CESC,OV,UCEC,BRCA,SKCM,HNSC,THCA	0.0284	0.135
ENSG00000251562	MALAT1	ENSG00000156127	BATF	ENSG00000068831	RASGRP2	0.0335	0.504	1	0	0	+ ++	0.0335	0.555	pan	LGG,GBM,KICH,KIRC,KIRP,BLCA,PRAD,LUAD,LUSC,COAD,READ,STAD,LIHC,CESC,OV,UCEC,BRCA,SKCM,HNSC,THCA	0.0434	0.00814
ENSG00000251562	MALAT1	ENSG00000156127	BATF	ENSG00000102901	CENPT	-0.11	0.412	1	0	0	- +	-0.11	0.438	pan	LGG,GBM,KICH,KIRC,KIRP,BLCA,PRAD,LUAD,LUSC,COAD,READ,STAD,LIHC,CESC,OV,UCEC,BRCA,SKCM,HNSC,THCA	0.0063	0.00262
ENSG00000251562	MALAT1	ENSG00000156127	BATF	ENSG00000158062	UBXN11	0.123	0.587	1	0	0	+ ++	0.124	0.673	pan	LGG,GBM,KICH,KIRC,KIRP,BLCA,PRAD,LUAD,LUSC,COAD,READ,STAD,LIHC,CESC,OV,UCEC,BRCA,SKCM,HNSC,THCA	0.018	0.0026
ENSG00000251562	MALAT1	ENSG00000156127	BATF	ENSG00000161996	WDR90	-0.0824	0.501	1	0	0	- +	-0.0826	0.551	pan	LGG,GBM,KICH,KIRC,KIRP,BLCA,PRAD,LUAD,LUSC,COAD,READ,STAD,LIHC,CESC,OV,UCEC,BRCA,SKCM,HNSC,THCA	0.00773	0.0044
ENSG00000251562	MALAT1	ENSG00000158773	USF1	ENSG00000002016	RAD52	0.141	0.596	1	0	0	+ ++	0.142	0.687	pan	LGG,GBM,KICH,KIRC,KIRP,BLCA,PRAD,LUAD,LUSC,COAD,READ,STAD,LIHC,CESC,OV,UCEC,BRCA,SKCM,HNSC,THCA	0.0234	0.00702
ENSG00000251562	MALAT1	ENSG00000158773	USF1	ENSG00000003756	RBM5	0.0314	0.621	1	0	0	+ ++	0.0314	0.727	pan	LGG,GBM,KICH,KIRC,KIRP,BLCA,PRAD,LUAD,LUSC,COAD,READ,STAD,LIHC,CESC,OV,UCEC,BRCA,SKCM,HNSC,THCA	0.0263	0.0317
ENSG00000251562	MALAT1	ENSG00000158773	USF1	ENSG00000010322	NISCH	-0.0439	0.457	1	0	0	- +	-0.0439	0.494	pan	LGG,GBM,KICH,KIRC,KIRP,BLCA,PRAD,LUAD,LUSC,COAD,READ,STAD,LIHC,CESC,OV,UCEC,BRCA,SKCM,HNSC,THCA	0.000373	0.0169
ENSG00000251562	MALAT1	ENSG00000158773	USF1	ENSG00000057468	MSH4	0.00576	0.52	1	0	0	+ ++	0.00576	0.577	pan	LGG,GBM,KICH,KIRC,KIRP,BLCA,PRAD,LUAD,LUSC,COAD,READ,STAD,LIHC,CESC,OV,UCEC,BRCA,SKCM,HNSC,THCA	0.0032	0.00781
ENSG00000251562	MALAT1	ENSG00000158773	USF1	ENSG00000058453	CROCC	0.0625	0.752	1	0	0	+ ++	0.0626	0.978	pan	LGG,GBM,KICH,KIRC,KIRP,BLCA,PRAD,LUAD,LUSC,COAD,READ,STAD,LIHC,CESC,OV,UCEC,BRCA,SKCM,HNSC,THCA	0.0105	0.00633
ENSG00000251562	MALAT1	ENSG00000158773	USF1	ENSG00000061938	TNK2	0.188	0.71	1	0	0	+ ++	0.19	0.887	pan	LGG,GBM,KICH,KIRC,KIRP,BLCA,PRAD,LUAD,LUSC,COAD,READ,STAD,LIHC,CESC,OV,UCEC,BRCA,SKCM,HNSC,THCA	0.00362	0.00368
ENSG00000251562	MALAT1	ENSG00000158773	USF1	ENSG00000067191	CACNB1	0.238	0.747	1	0	0	+ ++	0.243	0.966	pan	LGG,GBM,KICH,KIRC,KIRP,BLCA,PRAD,LUAD,LUSC,COAD,READ,STAD,LIHC,CESC,OV,UCEC,BRCA,SKCM,HNSC,THCA	0.0002	0.00096
ENSG00000251562	MALAT1	ENSG00000158773	USF1	ENSG00000074855	ANO8	-0.0558	0.57	1	0	0	- +	-0.0559	0.647	pan	LGG,GBM,KICH,KIRC,KIRP,BLCA,PRAD,LUAD,LUSC,COAD,READ,STAD,LIHC,CESC,OV,UCEC,BRCA,SKCM,HNSC,THCA	0.00991	0.00171
ENSG00000251562	MALAT1	ENSG00000158773	USF1	ENSG00000082512	TRAF5	0.208	0.692	1	0	0	+ ++	0.211	0.852	pan	LGG,GBM,KICH,KIRC,KIRP,BLCA,PRAD,LUAD,LUSC,COAD,READ,STAD,LIHC,CESC,OV,UCEC,BRCA,SKCM,HNSC,THCA	0.000667	0.005
ENSG00000251562	MALAT1	ENSG00000158773	USF1	ENSG00000088448	ANKRD10	0.222	0.774	1	0	0	+ ++	0.226	1.03	pan	LGG,GBM,KICH,KIRC,KIRP,BLCA,PRAD,LUAD,LUSC,COAD,READ,STAD,LIHC,CESC,OV,UCEC,BRCA,SKCM,HNSC,THCA	0.011	0.00399
ENSG00000251562	MALAT1	ENSG00000158773	USF1	ENSG00000090924	PLEKHG2	-0.0123	0.531	1	0	0	- +	-0.0123	0.591	pan	LGG,GBM,KICH,KIRC,KIRP,BLCA,PRAD,LUAD,LUSC,COAD,READ,STAD,LIHC,CESC,OV,UCEC,BRCA,SKCM,HNSC,THCA	0.000638	0.0082
ENSG00000251562	MALAT1	ENSG00000158773	USF1	ENSG00000092529	CAPN3	0.0196	0.571	1	0	0	+ ++	0.0196	0.649	pan	LGG,GBM,KICH,KIRC,KIRP,BLCA,PRAD,LUAD,LUSC,COAD,READ,STAD,LIHC,CESC,OV,UCEC,BRCA,SKCM,HNSC,THCA	0.00234	0.0055
ENSG00000251562	MALAT1	ENSG00000158773	USF1	ENSG00000099326	MZF1	0.174	0.68	1	0	0	+ ++	0.176	0.829	pan	LGG,GBM,KICH,KIRC,KIRP,BLCA,PRAD,LUAD,LUSC,COAD,READ,STAD,LIHC,CESC,OV,UCEC,BRCA,SKCM,HNSC,THCA	0.00974	0.0244
ENSG00000251562	MALAT1	ENSG00000158773	USF1	ENSG00000100813	ACIN1	0.182	0.662	1	0	0	+ ++	0.184	0.796	pan	LGG,GBM,KICH,KIRC,KIRP,BLCA,PRAD,LUAD,LUSC,COAD,READ,STAD,LIHC,CESC,OV,UCEC,BRCA,SKCM,HNSC,THCA	0.0372	0.00963
ENSG00000251562	MALAT1	ENSG00000158773	USF1	ENSG00000100968	NFATC4	-0.00811	0.517	1	0	0	- +	-0.00812	0.572	pan	LGG,GBM,KICH,KIRC,KIRP,BLCA,PRAD,LUAD,LUSC,COAD,READ,STAD,LIHC,CESC,OV,UCEC,BRCA,SKCM,HNSC,THCA	0.0039	0.0213
ENSG00000251562	MALAT1	ENSG00000158773	USF1	ENSG00000102904	TSNAXIP1	0.0227	0.598	1	0	0	+ ++	0.0228	0.69	pan	LGG,GBM,KICH,KIRC,KIRP,BLCA,PRAD,LUAD,LUSC,COAD,READ,STAD,LIHC,CESC,OV,UCEC,BRCA,SKCM,HNSC,THCA	0.0315	0.00369
ENSG00000251562	MALAT1	ENSG00000158773	USF1	ENSG00000103091	WDR59	-0.0778	0.421	1	0	0	- +	-0.078	0.449	pan	LGG,GBM,KICH,KIRC,KIRP,BLCA,PRAD,LUAD,LUSC,COAD,READ,STAD,LIHC,CESC,OV,UCEC,BRCA,SKCM,HNSC,THCA	0.0451	0.0188
ENSG00000251562	MALAT1	ENSG00000158773	USF1	ENSG00000105127	AKAP8	-0.00422	0.578	1	0	0	- +	-0.00422	0.659	pan	LGG,GBM,KICH,KIRC,KIRP,BLCA,PRAD,LUAD,LUSC,COAD,READ,STAD,LIHC,CESC,OV,UCEC,BRCA,SKCM,HNSC,THCA	0.0332	0.00645
ENSG00000251562	MALAT1	ENSG00000158773	USF1	ENSG00000113108	APBB3	0.2	0.762	1	0	0	+ ++	0.203	1	pan	LGG,GBM,KICH,KIRC,KIRP,BLCA,PRAD,LUAD,LUSC,COAD,READ,STAD,LIHC,CESC,OV,UCEC,BRCA,SKCM,HNSC,THCA	0.00731	0.0176
ENSG00000251562	MALAT1	ENSG00000158773	USF1	ENSG00000113649	TCERG1	0.181	0.641	1	0	0	+ ++	0.183	0.759	pan	LGG,GBM,KICH,KIRC,KIRP,BLCA,PRAD,LUAD,LUSC,COAD,READ,STAD,LIHC,CESC,OV,UCEC,BRCA,SKCM,HNSC,THCA	0.0019	0.00214
ENSG00000251562	MALAT1	ENSG00000158773	USF1	ENSG00000114857	NKTR	0.0908	0.611	1	0	0	+ ++	0.091	0.71	pan	LGG,GBM,KICH,KIRC,KIRP,BLCA,PRAD,LUAD,LUSC,COAD,READ,STAD,LIHC,CESC,OV,UCEC,BRCA,SKCM,HNSC,THCA	0.00546	0.0184
ENSG00000251562	MALAT1	ENSG00000158773	USF1	ENSG00000116001	TIA1	0.115	0.681	1	0	0	+ ++	0.115	0.832	pan	LGG,GBM,KICH,KIRC,KIRP,BLCA,PRAD,LUAD,LUSC,COAD,READ,STAD,LIHC,CESC,OV,UCEC,BRCA,SKCM,HNSC,THCA	0.000758	0.0026
ENSG00000251562	MALAT1	ENSG00000158773	USF1	ENSG00000116754	SRSF11	0.145	0.647	1	0	0	+ ++	0.146	0.771	pan	LGG,GBM,KICH,KIRC,KIRP,BLCA,PRAD,LUAD,LUSC,COAD,READ,STAD,LIHC,CESC,OV,UCEC,BRCA,SKCM,HNSC,THCA	0.00672	0.00518
ENSG00000251562	MALAT1	ENSG00000158773	USF1	ENSG00000117569	PTBP2	0.014	0.582	1	0	0	+ ++	0.014	0.666	pan	LGG,GBM,KICH,KIRC,KIRP,BLCA,PRAD,LUAD,LUSC,COAD,READ,STAD,LIHC,CESC,OV,UCEC,BRCA,SKCM,HNSC,THCA	0.014	0.000293
ENSG00000251562	MALAT1	ENSG00000158773	USF1	ENSG00000122435	TRMT13	0.0108	0.601	1	0	0	+ ++	0.0108	0.694	pan	LGG,GBM,KICH,KIRC,KIRP,BLCA,PRAD,LUAD,LUSC,COAD,READ,STAD,LIHC,CESC,OV,UCEC,BRCA,SKCM,HNSC,THCA	0.00686	0.00306
ENSG00000251562	MALAT1	ENSG00000158773	USF1	ENSG00000124222	STX16	0.0805	0.567	1	0	0	+ ++	0.0807	0.643	pan	LGG,GBM,KICH,KIRC,KIRP,BLCA,PRAD,LUAD,LUSC,COAD,READ,STAD,LIHC,CESC,OV,UCEC,BRCA,SKCM,HNSC,THCA	0.00052	0.000517
ENSG00000251562	MALAT1	ENSG00000158773	USF1	ENSG00000124593	PRICKLE4	0.0514	0.547	1	0	0	+ ++	0.0514	0.614	pan	LGG,GBM,KICH,KIRC,KIRP,BLCA,PRAD,LUAD,LUSC,COAD,READ,STAD,LIHC,CESC,OV,UCEC,BRCA,SKCM,HNSC,THCA	0.0189	0.0158
ENSG00000251562	MALAT1	ENSG00000158773	USF1	ENSG00000125503	PPP1R12C	0.2	0.708	1	0	0	+ ++	0.203	0.884	pan	LGG,GBM,KICH,KIRC,KIRP,BLCA,PRAD,LUAD,LUSC,COAD,READ,STAD,LIHC,CESC,OV,UCEC,BRCA,SKCM,HNSC,THCA	0.107	0.0113
ENSG00000251562	MALAT1	ENSG00000158773	USF1	ENSG00000125772	GPCPD1	-0.0272	0.486	1	0	0	- +	-0.0272	0.531	pan	LGG,GBM,KICH,KIRC,KIRP,BLCA,PRAD,LUAD,LUSC,COAD,READ,STAD,LIHC,CESC,OV,UCEC,BRCA,SKCM,HNSC,THCA	0.00298	0.0143
ENSG00000251562	MALAT1	ENSG00000158773	USF1	ENSG00000129946	SHC2	-0.0268	0.434	1	0	0	- +	-0.0268	0.464	pan	LGG,GBM,KICH,KIRC,KIRP,BLCA,PRAD,LUAD,LUSC,COAD,READ,STAD,LIHC,CESC,OV,UCEC,BRCA,SKCM,HNSC,THCA	0.00422	0.00419
ENSG00000251562	MALAT1	ENSG00000158773	USF1	ENSG00000130684	ZNF337	0.162	0.648	1	0	0	+ ++	0.163	0.772	pan	LGG,GBM,KICH,KIRC,KIRP,BLCA,PRAD,LUAD,LUSC,COAD,READ,STAD,LIHC,CESC,OV,UCEC,BRCA,SKCM,HNSC,THCA	0.00538	0.0134
ENSG00000251562	MALAT1	ENSG00000158773	USF1	ENSG00000130702	LAMA5	-0.128	0.455	1	0	0	- +	-0.129	0.491	pan	LGG,GBM,KICH,KIRC,KIRP,BLCA,PRAD,LUAD,LUSC,COAD,READ,STAD,LIHC,CESC,OV,UCEC,BRCA,SKCM,HNSC,THCA	0.000393	0.0557
ENSG00000251562	MALAT1	ENSG00000158773	USF1	ENSG00000132424	PNISR	0.0517	0.715	1	0	0	+ ++	0.0518	0.898	pan	LGG,GBM,KICH,KIRC,KIRP,BLCA,PRAD,LUAD,LUSC,COAD,READ,STAD,LIHC,CESC,OV,UCEC,BRCA,SKCM,HNSC,THCA	0.0126	0.0532
ENSG00000251562	MALAT1	ENSG00000158773	USF1	ENSG00000132485	ZRANB2	-0.0369	0.568	1	0	0	- +	-0.0369	0.645	pan	LGG,GBM,KICH,KIRC,KIRP,BLCA,PRAD,LUAD,LUSC,COAD,READ,STAD,LIHC,CESC,OV,UCEC,BRCA,SKCM,HNSC,THCA	0.0287	0.017
ENSG00000251562	MALAT1	ENSG00000158773	USF1	ENSG00000134253	TRIM45	-0.0177	0.465	1	0	0	- +	-0.0177	0.504	pan	LGG,GBM,KICH,KIRC,KIRP,BLCA,PRAD,LUAD,LUSC,COAD,READ,STAD,LIHC,CESC,OV,UCEC,BRCA,SKCM,HNSC,THCA	0.00107	0.000484
ENSG00000251562	MALAT1	ENSG00000158773	USF1	ENSG00000135164	DMTF1	0.0791	0.607	1	0	0	+ ++	0.0792	0.704	pan	LGG,GBM,KICH,KIRC,KIRP,BLCA,PRAD,LUAD,LUSC,COAD,READ,STAD,LIHC,CESC,OV,UCEC,BRCA,SKCM,HNSC,THCA	0.00758	0.0315
ENSG00000251562	MALAT1	ENSG00000158773	USF1	ENSG00000135473	PAN2	0.047	0.562	1	0	0	+ ++	0.047	0.635	pan	LGG,GBM,KICH,KIRC,KIRP,BLCA,PRAD,LUAD,LUSC,COAD,READ,STAD,LIHC,CESC,OV,UCEC,BRCA,SKCM,HNSC,THCA	0.0057	0.013
ENSG00000251562	MALAT1	ENSG00000158773	USF1	ENSG00000135740	SLC9A5	0.198	0.678	1	0	0	+ ++	0.2	0.825	pan	LGG,GBM,KICH,KIRC,KIRP,BLCA,PRAD,LUAD,LUSC,COAD,READ,STAD,LIHC,CESC,OV,UCEC,BRCA,SKCM,HNSC,THCA	0.000994	0.0137
ENSG00000251562	MALAT1	ENSG00000158773	USF1	ENSG00000137070	IL11RA	0.0807	0.629	1	0	0	+ ++	0.0809	0.74	pan	LGG,GBM,KICH,KIRC,KIRP,BLCA,PRAD,LUAD,LUSC,COAD,READ,STAD,LIHC,CESC,OV,UCEC,BRCA,SKCM,HNSC,THCA	0.00862	0.00505
ENSG00000251562	MALAT1	ENSG00000158773	USF1	ENSG00000137098	SPAG8	-0.0315	0.46	1	0	0	- +	-0.0315	0.497	pan	LGG,GBM,KICH,KIRC,KIRP,BLCA,PRAD,LUAD,LUSC,COAD,READ,STAD,LIHC,CESC,OV,UCEC,BRCA,SKCM,HNSC,THCA	0.0157	0.00946
ENSG00000251562	MALAT1	ENSG00000158773	USF1	ENSG00000138834	MAPK8IP3	0.177	0.707	1	0	0	+ ++	0.179	0.88	pan	LGG,GBM,KICH,KIRC,KIRP,BLCA,PRAD,LUAD,LUSC,COAD,READ,STAD,LIHC,CESC,OV,UCEC,BRCA,SKCM,HNSC,THCA	0.00376	0.00943
ENSG00000251562	MALAT1	ENSG00000158773	USF1	ENSG00000139625	MAP3K12	0.172	0.708	1	0	0	+ ++	0.173	0.882	pan	LGG,GBM,KICH,KIRC,KIRP,BLCA,PRAD,LUAD,LUSC,COAD,READ,STAD,LIHC,CESC,OV,UCEC,BRCA,SKCM,HNSC,THCA	0.00013	0.00143
ENSG00000251562	MALAT1	ENSG00000158773	USF1	ENSG00000139631	CSAD	0.257	0.736	1	0	0	+ ++	0.263	0.942	pan	LGG,GBM,KICH,KIRC,KIRP,BLCA,PRAD,LUAD,LUSC,COAD,READ,STAD,LIHC,CESC,OV,UCEC,BRCA,SKCM,HNSC,THCA	0.0013	0.0077
ENSG00000251562	MALAT1	ENSG00000158773	USF1	ENSG00000141956	PRDM15	0.0738	0.657	1	0	0	+ ++	0.074	0.787	pan	LGG,GBM,KICH,KIRC,KIRP,BLCA,PRAD,LUAD,LUSC,COAD,READ,STAD,LIHC,CESC,OV,UCEC,BRCA,SKCM,HNSC,THCA	0.00403	0.00297
ENSG00000251562	MALAT1	ENSG00000158773	USF1	ENSG00000143442	POGZ	0.0378	0.651	1	0	0	+ ++	0.0379	0.777	pan	LGG,GBM,KICH,KIRC,KIRP,BLCA,PRAD,LUAD,LUSC,COAD,READ,STAD,LIHC,CESC,OV,UCEC,BRCA,SKCM,HNSC,THCA	0.044	0.00787
ENSG00000251562	MALAT1	ENSG00000158773	USF1	ENSG00000147162	OGT	-0.019	0.442	1	0	0	- +	-0.019	0.474	pan	LGG,GBM,KICH,KIRC,KIRP,BLCA,PRAD,LUAD,LUSC,COAD,READ,STAD,LIHC,CESC,OV,UCEC,BRCA,SKCM,HNSC,THCA	0.00982	0.0332
ENSG00000251562	MALAT1	ENSG00000158773	USF1	ENSG00000154134	ROBO3	0.107	0.633	1	0	0	+ ++	0.107	0.747	pan	LGG,GBM,KICH,KIRC,KIRP,BLCA,PRAD,LUAD,LUSC,COAD,READ,STAD,LIHC,CESC,OV,UCEC,BRCA,SKCM,HNSC,THCA	0.000712	6.88e-05
ENSG00000251562	MALAT1	ENSG00000158773	USF1	ENSG00000155761	SPAG17	-0.0865	0.438	1	0	0	- +	-0.0867	0.47	pan	LGG,GBM,KICH,KIRC,KIRP,BLCA,PRAD,LUAD,LUSC,COAD,READ,STAD,LIHC,CESC,OV,UCEC,BRCA,SKCM,HNSC,THCA	0.00073	0.00103
ENSG00000251562	MALAT1	ENSG00000158773	USF1	ENSG00000161010	C5orf45	0.0522	0.55	1	0	0	+ ++	0.0523	0.618	pan	LGG,GBM,KICH,KIRC,KIRP,BLCA,PRAD,LUAD,LUSC,COAD,READ,STAD,LIHC,CESC,OV,UCEC,BRCA,SKCM,HNSC,THCA	0.0115	0.0048
ENSG00000251562	MALAT1	ENSG00000158773	USF1	ENSG00000161381	PLXDC1	-0.0775	0.497	1	0	0	- +	-0.0776	0.545	pan	LGG,GBM,KICH,KIRC,KIRP,BLCA,PRAD,LUAD,LUSC,COAD,READ,STAD,LIHC,CESC,OV,UCEC,BRCA,SKCM,HNSC,THCA	0.000632	0.00784
ENSG00000251562	MALAT1	ENSG00000158773	USF1	ENSG00000161996	WDR90	0.126	0.658	1	0	0	+ ++	0.127	0.789	pan	LGG,GBM,KICH,KIRC,KIRP,BLCA,PRAD,LUAD,LUSC,COAD,READ,STAD,LIHC,CESC,OV,UCEC,BRCA,SKCM,HNSC,THCA	0.00563	0.0069
ENSG00000251562	MALAT1	ENSG00000158773	USF1	ENSG00000163516	ANKZF1	0.217	0.677	1	0	0	+ ++	0.221	0.823	pan	LGG,GBM,KICH,KIRC,KIRP,BLCA,PRAD,LUAD,LUSC,COAD,READ,STAD,LIHC,CESC,OV,UCEC,BRCA,SKCM,HNSC,THCA	0.014	0.0152
ENSG00000251562	MALAT1	ENSG00000158773	USF1	ENSG00000163617	CCDC191	-0.0369	0.561	1	0	0	- +	-0.0369	0.634	pan	LGG,GBM,KICH,KIRC,KIRP,BLCA,PRAD,LUAD,LUSC,COAD,READ,STAD,LIHC,CESC,OV,UCEC,BRCA,SKCM,HNSC,THCA	0.014	0.0412
ENSG00000251562	MALAT1	ENSG00000158773	USF1	ENSG00000163945	UVSSA	-0.0841	0.444	1	0	0	- +	-0.0843	0.477	pan	LGG,GBM,KICH,KIRC,KIRP,BLCA,PRAD,LUAD,LUSC,COAD,READ,STAD,LIHC,CESC,OV,UCEC,BRCA,SKCM,HNSC,THCA	0.00199	0.0251
ENSG00000251562	MALAT1	ENSG00000158773	USF1	ENSG00000164048	ZNF589	-0.023	0.492	1	0	0	- +	-0.023	0.538	pan	LGG,GBM,KICH,KIRC,KIRP,BLCA,PRAD,LUAD,LUSC,COAD,READ,STAD,LIHC,CESC,OV,UCEC,BRCA,SKCM,HNSC,THCA	0.00923	0.00893
ENSG00000251562	MALAT1	ENSG00000158773	USF1	ENSG00000164050	PLXNB1	-0.103	0.404	1	0	0	- +	-0.103	0.428	pan	LGG,GBM,KICH,KIRC,KIRP,BLCA,PRAD,LUAD,LUSC,COAD,READ,STAD,LIHC,CESC,OV,UCEC,BRCA,SKCM,HNSC,THCA	0.000752	0.0113
ENSG00000251562	MALAT1	ENSG00000158773	USF1	ENSG00000167371	PRRT2	0.105	0.67	1	0	0	+ ++	0.105	0.81	pan	LGG,GBM,KICH,KIRC,KIRP,BLCA,PRAD,LUAD,LUSC,COAD,READ,STAD,LIHC,CESC,OV,UCEC,BRCA,SKCM,HNSC,THCA	0.0125	0.0102
ENSG00000251562	MALAT1	ENSG00000158773	USF1	ENSG00000168026	TTC21A	0.147	0.701	1	0	0	+ ++	0.148	0.87	pan	LGG,GBM,KICH,KIRC,KIRP,BLCA,PRAD,LUAD,LUSC,COAD,READ,STAD,LIHC,CESC,OV,UCEC,BRCA,SKCM,HNSC,THCA	0.00599	0.000946
ENSG00000251562	MALAT1	ENSG00000158773	USF1	ENSG00000168395	ING5	-0.0775	0.483	1	0	0	- +	-0.0776	0.527	pan	LGG,GBM,KICH,KIRC,KIRP,BLCA,PRAD,LUAD,LUSC,COAD,READ,STAD,LIHC,CESC,OV,UCEC,BRCA,SKCM,HNSC,THCA	0.00947	0.0177
ENSG00000251562	MALAT1	ENSG00000158773	USF1	ENSG00000169231	THBS3	0.157	0.704	1	0	0	+ ++	0.158	0.875	pan	LGG,GBM,KICH,KIRC,KIRP,BLCA,PRAD,LUAD,LUSC,COAD,READ,STAD,LIHC,CESC,OV,UCEC,BRCA,SKCM,HNSC,THCA	6.02e-05	0.000801
ENSG00000251562	MALAT1	ENSG00000158773	USF1	ENSG00000175309	PHYKPL	0.0468	0.552	1	0	0	+ ++	0.0468	0.621	pan	LGG,GBM,KICH,KIRC,KIRP,BLCA,PRAD,LUAD,LUSC,COAD,READ,STAD,LIHC,CESC,OV,UCEC,BRCA,SKCM,HNSC,THCA	0.0256	0.0122
ENSG00000251562	MALAT1	ENSG00000158773	USF1	ENSG00000185163	DDX51	0.0791	0.532	1	0	0	+ ++	0.0793	0.592	pan	LGG,GBM,KICH,KIRC,KIRP,BLCA,PRAD,LUAD,LUSC,COAD,READ,STAD,LIHC,CESC,OV,UCEC,BRCA,SKCM,HNSC,THCA	0.0019	0.00741
ENSG00000251562	MALAT1	ENSG00000158773	USF1	ENSG00000188038	NRN1L	0.108	0.575	1	0	0	+ ++	0.108	0.655	pan	LGG,GBM,KICH,KIRC,KIRP,BLCA,PRAD,LUAD,LUSC,COAD,READ,STAD,LIHC,CESC,OV,UCEC,BRCA,SKCM,HNSC,THCA	0.0127	0.00635
ENSG00000251562	MALAT1	ENSG00000158773	USF1	ENSG00000196123	KIAA0895L	0.145	0.617	1	0	0	+ ++	0.146	0.72	pan	LGG,GBM,KICH,KIRC,KIRP,BLCA,PRAD,LUAD,LUSC,COAD,READ,STAD,LIHC,CESC,OV,UCEC,BRCA,SKCM,HNSC,THCA	0.0066	0.00525
ENSG00000251562	MALAT1	ENSG00000158773	USF1	ENSG00000197608	ZNF841	-0.037	0.467	1	0	0	- +	-0.037	0.506	pan	LGG,GBM,KICH,KIRC,KIRP,BLCA,PRAD,LUAD,LUSC,COAD,READ,STAD,LIHC,CESC,OV,UCEC,BRCA,SKCM,HNSC,THCA	0.00192	0.00925
ENSG00000251562	MALAT1	ENSG00000158773	USF1	ENSG00000198105	ZNF248	-0.0619	0.472	1	0	0	- +	-0.0619	0.512	pan	LGG,GBM,KICH,KIRC,KIRP,BLCA,PRAD,LUAD,LUSC,COAD,READ,STAD,LIHC,CESC,OV,UCEC,BRCA,SKCM,HNSC,THCA	0.0518	0.0319
ENSG00000251562	MALAT1	ENSG00000158773	USF1	ENSG00000198393	ZNF26	0.171	0.636	1	0	0	+ ++	0.172	0.752	pan	LGG,GBM,KICH,KIRC,KIRP,BLCA,PRAD,LUAD,LUSC,COAD,READ,STAD,LIHC,CESC,OV,UCEC,BRCA,SKCM,HNSC,THCA	0.00293	0.000845
ENSG00000251562	MALAT1	ENSG00000158773	USF1	ENSG00000198429	ZNF69	0.0183	0.508	1	0	0	+ ++	0.0183	0.559	pan	LGG,GBM,KICH,KIRC,KIRP,BLCA,PRAD,LUAD,LUSC,COAD,READ,STAD,LIHC,CESC,OV,UCEC,BRCA,SKCM,HNSC,THCA	0.00157	0.00918
ENSG00000251562	MALAT1	ENSG00000158773	USF1	ENSG00000214655	ZSWIM8	0.15	0.666	1	0	0	+ ++	0.152	0.804	pan	LGG,GBM,KICH,KIRC,KIRP,BLCA,PRAD,LUAD,LUSC,COAD,READ,STAD,LIHC,CESC,OV,UCEC,BRCA,SKCM,HNSC,THCA	0.0297	0.0373
ENSG00000251562	MALAT1	ENSG00000158773	USF1	ENSG00000267680	ZNF224	-0.0873	0.569	1	0	0	- +	-0.0875	0.645	pan	LGG,GBM,KICH,KIRC,KIRP,BLCA,PRAD,LUAD,LUSC,COAD,READ,STAD,LIHC,CESC,OV,UCEC,BRCA,SKCM,HNSC,THCA	0.0108	0.00562
ENSG00000251562	MALAT1	ENSG00000169083	AR	ENSG00000088448	ANKRD10	-0.108	-0.604	1	0	0	- --	-0.108	-0.7	pan	LGG,GBM,KICH,KIRC,KIRP,BLCA,PRAD,LUAD,LUSC,COAD,READ,STAD,LIHC,CESC,OV,UCEC,BRCA,SKCM,HNSC,THCA	0.000315	0.00109
ENSG00000251562	MALAT1	ENSG00000169083	AR	ENSG00000117616	RSRP1	-0.0927	-0.544	1	0	0	- --	-0.093	-0.61	pan	LGG,GBM,KICH,KIRC,KIRP,BLCA,PRAD,LUAD,LUSC,COAD,READ,STAD,LIHC,CESC,OV,UCEC,BRCA,SKCM,HNSC,THCA	0.00275	0.012
ENSG00000251562	MALAT1	ENSG00000169083	AR	ENSG00000172890	NADSYN1	-0.145	-0.612	1	0	0	- --	-0.146	-0.712	pan	LGG,GBM,KICH,KIRC,KIRP,BLCA,PRAD,LUAD,LUSC,COAD,READ,STAD,LIHC,CESC,OV,UCEC,BRCA,SKCM,HNSC,THCA	0.0019	0.00877
ENSG00000251562	MALAT1	ENSG00000169083	AR	ENSG00000197969	VPS13A	0.636	0.179	1	0	0	++ +	0.752	0.181	pan	LGG,GBM,KICH,KIRC,KIRP,BLCA,PRAD,LUAD,LUSC,COAD,READ,STAD,LIHC,CESC,OV,UCEC,BRCA,SKCM,HNSC,THCA	1.54e-06	4.9e-06
ENSG00000251562	MALAT1	ENSG00000169083	AR	ENSG00000204311	DFNB59	-0.0275	-0.507	1	0	0	- --	-0.0275	-0.559	pan	LGG,GBM,KICH,KIRC,KIRP,BLCA,PRAD,LUAD,LUSC,COAD,READ,STAD,LIHC,CESC,OV,UCEC,BRCA,SKCM,HNSC,THCA	0.00104	0.0085
ENSG00000251562	MALAT1	ENSG00000173153	ESRRA	ENSG00000180902	D2HGDH	0.492	0.0289	1	0	0	++ +	0.539	0.0289	pan	LGG,GBM,KICH,KIRC,KIRP,BLCA,PRAD,LUAD,LUSC,COAD,READ,STAD,LIHC,CESC,OV,UCEC,BRCA,SKCM,HNSC,THCA	0.0266	0.0603
ENSG00000251562	MALAT1	ENSG00000185024	BRF1	ENSG00000106404	CLDN15	0.131	0.614	1	0	0	+ ++	0.131	0.716	pan	LGG,GBM,KICH,KIRC,KIRP,BLCA,PRAD,LUAD,LUSC,COAD,READ,STAD,LIHC,CESC,OV,UCEC,BRCA,SKCM,HNSC,THCA	0.00716	0.0566
ENSG00000251562	MALAT1	ENSG00000185024	BRF1	ENSG00000147437	GNRH1	0.043	0.517	1	0	0	+ ++	0.043	0.572	pan	LGG,GBM,KICH,KIRC,KIRP,BLCA,PRAD,LUAD,LUSC,COAD,READ,STAD,LIHC,CESC,OV,UCEC,BRCA,SKCM,HNSC,THCA	0.000881	0.0181

## Sheet: KIRP
#LncRNA ID	#LncRNA Symbol	#TF ID	#TF Symbol	#Gene ID	#Gene Symbol	#Correlation coefficient in lncRNA low expression group	#Correlation coefficient in lncRNA high expression group	#score	#p_value	#FDR	#LncRNA Modulators	#The Fisher transformation of correlation coefficient in lncRNA low expression group	#The Fisher transformation of correlation coefficient in lncRNA high expression group	#LncRNA Type	#Cancer	#The probability in discovery set	#The probability in validation set
ENSG00000251562	MALAT1	ENSG00000084093	REST	ENSG00000001631	KRIT1	0.651	0.168	0.996	0	0	++ +	0.776	0.17	pan	LGG,GBM,KICH,KIRC,KIRP,BLCA,PRAD,LUAD,LUSC,COAD,READ,STAD,LIHC,CESC,OV,UCEC,BRCA,SKCM,HNSC,THCA	0.102	0.984
ENSG00000251562	MALAT1	ENSG00000084093	REST	ENSG00000078699	CBFA2T2	0.611	0.057	0.998	0	0	++ +	0.711	0.0571	pan	LGG,GBM,KICH,KIRC,KIRP,BLCA,PRAD,LUAD,LUSC,COAD,READ,STAD,LIHC,CESC,OV,UCEC,BRCA,SKCM,HNSC,THCA	0.0983	0.946
ENSG00000251562	MALAT1	ENSG00000084093	REST	ENSG00000083097	DOPEY1	0.771	0.224	1	0	0	++ +	1.02	0.228	pan	LGG,GBM,KICH,KIRC,KIRP,BLCA,PRAD,LUAD,LUSC,COAD,READ,STAD,LIHC,CESC,OV,UCEC,BRCA,SKCM,HNSC,THCA	0.803	0.865
ENSG00000251562	MALAT1	ENSG00000084093	REST	ENSG00000095564	BTAF1	0.793	0.213	1	0	0	++ +	1.08	0.216	pan	LGG,GBM,KICH,KIRC,KIRP,BLCA,PRAD,LUAD,LUSC,COAD,READ,STAD,LIHC,CESC,OV,UCEC,BRCA,SKCM,HNSC,THCA	0.326	0.931
ENSG00000251562	MALAT1	ENSG00000084093	REST	ENSG00000115524	SF3B1	0.607	0.0351	0.998	0	0	++ +	0.704	0.0351	pan	LGG,GBM,KICH,KIRC,KIRP,BLCA,PRAD,LUAD,LUSC,COAD,READ,STAD,LIHC,CESC,OV,UCEC,BRCA,SKCM,HNSC,THCA	0.213	0.113
ENSG00000251562	MALAT1	ENSG00000084093	REST	ENSG00000119899	SLC17A5	0.162	0.737	1	0	0	+ ++	0.163	0.944	pan	LGG,GBM,KICH,KIRC,KIRP,BLCA,PRAD,LUAD,LUSC,COAD,READ,STAD,LIHC,CESC,OV,UCEC,BRCA,SKCM,HNSC,THCA	0.956	0.909
ENSG00000251562	MALAT1	ENSG00000084093	REST	ENSG00000127415	IDUA	-0.164	-0.639	0.995	0	0	- --	-0.165	-0.756	pan	LGG,GBM,KICH,KIRC,KIRP,BLCA,PRAD,LUAD,LUSC,COAD,READ,STAD,LIHC,CESC,OV,UCEC,BRCA,SKCM,HNSC,THCA	0.184	0.882
ENSG00000251562	MALAT1	ENSG00000084093	REST	ENSG00000151835	SACS	0.777	0.272	1	0	0	++ +	1.04	0.279	pan	LGG,GBM,KICH,KIRC,KIRP,BLCA,PRAD,LUAD,LUSC,COAD,READ,STAD,LIHC,CESC,OV,UCEC,BRCA,SKCM,HNSC,THCA	0.835	0.576
ENSG00000251562	MALAT1	ENSG00000084093	REST	ENSG00000164830	OXR1	0.595	0.133	0.991	0	0	++ +	0.686	0.134	pan	LGG,GBM,KICH,KIRC,KIRP,BLCA,PRAD,LUAD,LUSC,COAD,READ,STAD,LIHC,CESC,OV,UCEC,BRCA,SKCM,HNSC,THCA	0.206	0.392
ENSG00000251562	MALAT1	ENSG00000084093	REST	ENSG00000169155	ZBTB43	0.674	0.106	0.999	0	0	++ +	0.818	0.106	pan	LGG,GBM,KICH,KIRC,KIRP,BLCA,PRAD,LUAD,LUSC,COAD,READ,STAD,LIHC,CESC,OV,UCEC,BRCA,SKCM,HNSC,THCA	0.769	0.585
ENSG00000251562	MALAT1	ENSG00000084093	REST	ENSG00000173064	HECTD4	0.824	0.358	1	0	0	++ +	1.17	0.374	pan	LGG,GBM,KICH,KIRC,KIRP,BLCA,PRAD,LUAD,LUSC,COAD,READ,STAD,LIHC,CESC,OV,UCEC,BRCA,SKCM,HNSC,THCA	0.58	0.931
ENSG00000251562	MALAT1	ENSG00000084093	REST	ENSG00000185955	C7orf61	-0.135	-0.681	0.999	0	0	- --	-0.136	-0.83	pan	LGG,GBM,KICH,KIRC,KIRP,BLCA,PRAD,LUAD,LUSC,COAD,READ,STAD,LIHC,CESC,OV,UCEC,BRCA,SKCM,HNSC,THCA	0.148	0.0905
ENSG00000251562	MALAT1	ENSG00000084093	REST	ENSG00000197056	ZMYM1	0.705	0.224	0.998	0	0	++ +	0.877	0.228	pan	LGG,GBM,KICH,KIRC,KIRP,BLCA,PRAD,LUAD,LUSC,COAD,READ,STAD,LIHC,CESC,OV,UCEC,BRCA,SKCM,HNSC,THCA	0.858	0.682
ENSG00000251562	MALAT1	ENSG00000091831	ESR1	ENSG00000135636	DYSF	-0.00495	0.632	1	0	0	- +	-0.00495	0.745	pan	LGG,GBM,KICH,KIRC,KIRP,BLCA,PRAD,LUAD,LUSC,COAD,READ,STAD,LIHC,CESC,OV,UCEC,BRCA,SKCM,HNSC,THCA	0.866	0.944
ENSG00000251562	MALAT1	ENSG00000100393	EP300	ENSG00000078699	CBFA2T2	0.648	0.169	0.995	0	0	++ +	0.772	0.17	pan	LGG,GBM,KICH,KIRC,KIRP,BLCA,PRAD,LUAD,LUSC,COAD,READ,STAD,LIHC,CESC,OV,UCEC,BRCA,SKCM,HNSC,THCA	0.212	0.343
ENSG00000251562	MALAT1	ENSG00000100393	EP300	ENSG00000160305	DIP2A	0.681	0.157	0.998	0	0	++ +	0.83	0.158	pan	LGG,GBM,KICH,KIRC,KIRP,BLCA,PRAD,LUAD,LUSC,COAD,READ,STAD,LIHC,CESC,OV,UCEC,BRCA,SKCM,HNSC,THCA	0.444	0.971
ENSG00000251562	MALAT1	ENSG00000109320	NFKB1	ENSG00000118855	MFSD1	0.0842	0.616	0.997	0	0	+ ++	0.0844	0.719	pan	LGG,GBM,KICH,KIRC,KIRP,BLCA,PRAD,LUAD,LUSC,COAD,READ,STAD,LIHC,CESC,OV,UCEC,BRCA,SKCM,HNSC,THCA	0.142	0.574
ENSG00000251562	MALAT1	ENSG00000109320	NFKB1	ENSG00000134815	DHX34	-0.102	-0.639	0.998	0	0	- --	-0.103	-0.757	pan	LGG,GBM,KICH,KIRC,KIRP,BLCA,PRAD,LUAD,LUSC,COAD,READ,STAD,LIHC,CESC,OV,UCEC,BRCA,SKCM,HNSC,THCA	0.0652	0.917
ENSG00000251562	MALAT1	ENSG00000109320	NFKB1	ENSG00000146085	MUT	0.138	0.631	0.996	0	0	+ ++	0.139	0.743	pan	LGG,GBM,KICH,KIRC,KIRP,BLCA,PRAD,LUAD,LUSC,COAD,READ,STAD,LIHC,CESC,OV,UCEC,BRCA,SKCM,HNSC,THCA	0.00962	0.599
ENSG00000251562	MALAT1	ENSG00000115415	STAT1	ENSG00000102024	PLS3	0.0908	0.636	0.998	0	0	+ ++	0.0911	0.752	pan	LGG,GBM,KICH,KIRC,KIRP,BLCA,PRAD,LUAD,LUSC,COAD,READ,STAD,LIHC,CESC,OV,UCEC,BRCA,SKCM,HNSC,THCA	0.128	0.00557
ENSG00000251562	MALAT1	ENSG00000120690	ELF1	ENSG00000083097	DOPEY1	0.784	0.319	0.999	0	0	++ +	1.05	0.331	pan	LGG,GBM,KICH,KIRC,KIRP,BLCA,PRAD,LUAD,LUSC,COAD,READ,STAD,LIHC,CESC,OV,UCEC,BRCA,SKCM,HNSC,THCA	0.0492	0.436
ENSG00000251562	MALAT1	ENSG00000120690	ELF1	ENSG00000104852	SNRNP70	-0.668	-0.206	0.995	0	0	-- -	-0.808	-0.209	pan	LGG,GBM,KICH,KIRC,KIRP,BLCA,PRAD,LUAD,LUSC,COAD,READ,STAD,LIHC,CESC,OV,UCEC,BRCA,SKCM,HNSC,THCA	0.0733	0.778
ENSG00000251562	MALAT1	ENSG00000130522	JUND	ENSG00000125657	TNFSF9	0.0927	0.655	0.999	0	0	+ ++	0.093	0.783	pan	LGG,GBM,KICH,KIRC,KIRP,BLCA,PRAD,LUAD,LUSC,COAD,READ,STAD,LIHC,CESC,OV,UCEC,BRCA,SKCM,HNSC,THCA	0.0358	0.892
ENSG00000251562	MALAT1	ENSG00000130522	JUND	ENSG00000177556	ATOX1	0.217	0.695	0.997	0	0	+ ++	0.22	0.857	pan	LGG,GBM,KICH,KIRC,KIRP,BLCA,PRAD,LUAD,LUSC,COAD,READ,STAD,LIHC,CESC,OV,UCEC,BRCA,SKCM,HNSC,THCA	0.231	0.775
ENSG00000251562	MALAT1	ENSG00000134954	ETS1	ENSG00000044524	EPHA3	0.626	0.132	0.995	0	0	++ +	0.735	0.133	pan	LGG,GBM,KICH,KIRC,KIRP,BLCA,PRAD,LUAD,LUSC,COAD,READ,STAD,LIHC,CESC,OV,UCEC,BRCA,SKCM,HNSC,THCA	0.00219	0.0417
ENSG00000251562	MALAT1	ENSG00000139613	SMARCC2	ENSG00000108474	PIGL	-0.188	0.575	1	0	0	- +	-0.19	0.655	pan	LGG,GBM,KICH,KIRC,KIRP,BLCA,PRAD,LUAD,LUSC,COAD,READ,STAD,LIHC,CESC,OV,UCEC,BRCA,SKCM,HNSC,THCA	0.1	0.778
ENSG00000251562	MALAT1	ENSG00000139613	SMARCC2	ENSG00000111364	DDX55	0.156	0.695	0.999	0	0	+ ++	0.157	0.858	pan	LGG,GBM,KICH,KIRC,KIRP,BLCA,PRAD,LUAD,LUSC,COAD,READ,STAD,LIHC,CESC,OV,UCEC,BRCA,SKCM,HNSC,THCA	0.564	0.045
ENSG00000251562	MALAT1	ENSG00000139613	SMARCC2	ENSG00000136098	NEK3	-0.222	0.445	0.999	0	0	- +	-0.226	0.478	pan	LGG,GBM,KICH,KIRC,KIRP,BLCA,PRAD,LUAD,LUSC,COAD,READ,STAD,LIHC,CESC,OV,UCEC,BRCA,SKCM,HNSC,THCA	0.122	0.298
ENSG00000251562	MALAT1	ENSG00000139613	SMARCC2	ENSG00000139190	VAMP1	0.112	0.602	0.994	0	0	+ ++	0.112	0.696	pan	LGG,GBM,KICH,KIRC,KIRP,BLCA,PRAD,LUAD,LUSC,COAD,READ,STAD,LIHC,CESC,OV,UCEC,BRCA,SKCM,HNSC,THCA	0.635	0.712
ENSG00000251562	MALAT1	ENSG00000139613	SMARCC2	ENSG00000139631	CSAD	0.0631	0.587	0.996	0	0	+ ++	0.0632	0.673	pan	LGG,GBM,KICH,KIRC,KIRP,BLCA,PRAD,LUAD,LUSC,COAD,READ,STAD,LIHC,CESC,OV,UCEC,BRCA,SKCM,HNSC,THCA	0.567	0.816
ENSG00000251562	MALAT1	ENSG00000140262	TCF12	ENSG00000095564	BTAF1	0.744	0.203	1	0	0	++ +	0.958	0.206	pan	LGG,GBM,KICH,KIRC,KIRP,BLCA,PRAD,LUAD,LUSC,COAD,READ,STAD,LIHC,CESC,OV,UCEC,BRCA,SKCM,HNSC,THCA	0.503	0.891
ENSG00000251562	MALAT1	ENSG00000140262	TCF12	ENSG00000119899	SLC17A5	0.0669	0.638	0.999	0	0	+ ++	0.067	0.755	pan	LGG,GBM,KICH,KIRC,KIRP,BLCA,PRAD,LUAD,LUSC,COAD,READ,STAD,LIHC,CESC,OV,UCEC,BRCA,SKCM,HNSC,THCA	0.921	0.84
ENSG00000251562	MALAT1	ENSG00000147133	TAF1	ENSG00000090905	TNRC6A	0.71	0.224	0.998	0	0	++ +	0.888	0.228	pan	LGG,GBM,KICH,KIRC,KIRP,BLCA,PRAD,LUAD,LUSC,COAD,READ,STAD,LIHC,CESC,OV,UCEC,BRCA,SKCM,HNSC,THCA	0.263	0.229
ENSG00000251562	MALAT1	ENSG00000147133	TAF1	ENSG00000138658	ZGRF1	0.603	0.134	0.992	0	0	++ +	0.698	0.135	pan	LGG,GBM,KICH,KIRC,KIRP,BLCA,PRAD,LUAD,LUSC,COAD,READ,STAD,LIHC,CESC,OV,UCEC,BRCA,SKCM,HNSC,THCA	0.129	0.183
ENSG00000251562	MALAT1	ENSG00000147133	TAF1	ENSG00000160305	DIP2A	0.709	0.232	0.998	0	0	++ +	0.884	0.237	pan	LGG,GBM,KICH,KIRC,KIRP,BLCA,PRAD,LUAD,LUSC,COAD,READ,STAD,LIHC,CESC,OV,UCEC,BRCA,SKCM,HNSC,THCA	0.0423	0.371
ENSG00000251562	MALAT1	ENSG00000147133	TAF1	ENSG00000184445	KNTC1	0.606	0.0766	0.997	0	0	++ +	0.702	0.0767	pan	LGG,GBM,KICH,KIRC,KIRP,BLCA,PRAD,LUAD,LUSC,COAD,READ,STAD,LIHC,CESC,OV,UCEC,BRCA,SKCM,HNSC,THCA	0.0391	0.12
ENSG00000251562	MALAT1	ENSG00000154727	GABPA	ENSG00000095564	BTAF1	0.836	0.302	1	0	0	++ +	1.21	0.312	pan	LGG,GBM,KICH,KIRC,KIRP,BLCA,PRAD,LUAD,LUSC,COAD,READ,STAD,LIHC,CESC,OV,UCEC,BRCA,SKCM,HNSC,THCA	0.281	0.735
ENSG00000251562	MALAT1	ENSG00000154727	GABPA	ENSG00000134186	PRPF38B	0.831	0.342	1	0	0	++ +	1.19	0.356	pan	LGG,GBM,KICH,KIRC,KIRP,BLCA,PRAD,LUAD,LUSC,COAD,READ,STAD,LIHC,CESC,OV,UCEC,BRCA,SKCM,HNSC,THCA	0.136	0.461
ENSG00000251562	MALAT1	ENSG00000157554	ERG	ENSG00000107796	ACTA2	0.783	0.325	0.999	0	0	++ +	1.05	0.337	pan	LGG,GBM,KICH,KIRC,KIRP,BLCA,PRAD,LUAD,LUSC,COAD,READ,STAD,LIHC,CESC,OV,UCEC,BRCA,SKCM,HNSC,THCA	0.00614	0.0156
ENSG00000251562	MALAT1	ENSG00000157554	ERG	ENSG00000136114	THSD1	0.752	0.157	1	0	0	++ +	0.978	0.158	pan	LGG,GBM,KICH,KIRC,KIRP,BLCA,PRAD,LUAD,LUSC,COAD,READ,STAD,LIHC,CESC,OV,UCEC,BRCA,SKCM,HNSC,THCA	0.179	0.0545
ENSG00000251562	MALAT1	ENSG00000157554	ERG	ENSG00000138036	DYNC2LI1	-0.494	0.0276	0.993	0	0	- +	-0.542	0.0276	pan	LGG,GBM,KICH,KIRC,KIRP,BLCA,PRAD,LUAD,LUSC,COAD,READ,STAD,LIHC,CESC,OV,UCEC,BRCA,SKCM,HNSC,THCA	0.00488	0.0121
ENSG00000251562	MALAT1	ENSG00000157554	ERG	ENSG00000140545	MFGE8	0.702	0.0812	1	0	0	++ +	0.87	0.0814	pan	LGG,GBM,KICH,KIRC,KIRP,BLCA,PRAD,LUAD,LUSC,COAD,READ,STAD,LIHC,CESC,OV,UCEC,BRCA,SKCM,HNSC,THCA	0.0689	0.0355
ENSG00000251562	MALAT1	ENSG00000157554	ERG	ENSG00000154743	TSEN2	-0.55	-0.0315	0.994	0	0	-- -	-0.618	-0.0316	pan	LGG,GBM,KICH,KIRC,KIRP,BLCA,PRAD,LUAD,LUSC,COAD,READ,STAD,LIHC,CESC,OV,UCEC,BRCA,SKCM,HNSC,THCA	0.0382	0.1
ENSG00000251562	MALAT1	ENSG00000157554	ERG	ENSG00000156049	GNA14	0.815	0.253	1	0	0	++ +	1.14	0.259	pan	LGG,GBM,KICH,KIRC,KIRP,BLCA,PRAD,LUAD,LUSC,COAD,READ,STAD,LIHC,CESC,OV,UCEC,BRCA,SKCM,HNSC,THCA	0.00263	0.119
ENSG00000251562	MALAT1	ENSG00000157554	ERG	ENSG00000156466	GDF6	0.592	0.0348	0.998	0	0	++ +	0.681	0.0348	pan	LGG,GBM,KICH,KIRC,KIRP,BLCA,PRAD,LUAD,LUSC,COAD,READ,STAD,LIHC,CESC,OV,UCEC,BRCA,SKCM,HNSC,THCA	0.01	0.0135
ENSG00000251562	MALAT1	ENSG00000157554	ERG	ENSG00000182218	HHIPL1	0.657	0.165	0.997	0	0	++ +	0.788	0.166	pan	LGG,GBM,KICH,KIRC,KIRP,BLCA,PRAD,LUAD,LUSC,COAD,READ,STAD,LIHC,CESC,OV,UCEC,BRCA,SKCM,HNSC,THCA	0.24	0.152
ENSG00000251562	MALAT1	ENSG00000157554	ERG	ENSG00000204950	LRRC10B	0.734	0.186	1	0	0	++ +	0.937	0.188	pan	LGG,GBM,KICH,KIRC,KIRP,BLCA,PRAD,LUAD,LUSC,COAD,READ,STAD,LIHC,CESC,OV,UCEC,BRCA,SKCM,HNSC,THCA	0.011	0.0211
ENSG00000251562	MALAT1	ENSG00000164330	EBF1	ENSG00000138036	DYNC2LI1	-0.623	0.00206	0.999	0	0	- +	-0.73	0.00206	pan	LGG,GBM,KICH,KIRC,KIRP,BLCA,PRAD,LUAD,LUSC,COAD,READ,STAD,LIHC,CESC,OV,UCEC,BRCA,SKCM,HNSC,THCA	0.00354	0.0637
ENSG00000251562	MALAT1	ENSG00000166949	SMAD3	ENSG00000155465	SLC7A7	-0.522	-0.0527	0.987	0	0	-- -	-0.58	-0.0527	pan	LGG,GBM,KICH,KIRC,KIRP,BLCA,PRAD,LUAD,LUSC,COAD,READ,STAD,LIHC,CESC,OV,UCEC,BRCA,SKCM,HNSC,THCA	0.011	0.244
ENSG00000251562	MALAT1	ENSG00000172216	CEBPB	ENSG00000135951	TSGA10	-0.667	-0.188	0.996	0	0	-- -	-0.806	-0.19	pan	LGG,GBM,KICH,KIRC,KIRP,BLCA,PRAD,LUAD,LUSC,COAD,READ,STAD,LIHC,CESC,OV,UCEC,BRCA,SKCM,HNSC,THCA	0.0253	0.116
ENSG00000251562	MALAT1	ENSG00000173473	SMARCC1	ENSG00000114739	ACVR2B	0.774	0.298	0.999	0	0	++ +	1.03	0.307	pan	LGG,GBM,KICH,KIRC,KIRP,BLCA,PRAD,LUAD,LUSC,COAD,READ,STAD,LIHC,CESC,OV,UCEC,BRCA,SKCM,HNSC,THCA	0.0848	0.887
ENSG00000251562	MALAT1	ENSG00000173473	SMARCC1	ENSG00000146247	PHIP	0.614	0.104	0.996	0	0	++ +	0.715	0.104	pan	LGG,GBM,KICH,KIRC,KIRP,BLCA,PRAD,LUAD,LUSC,COAD,READ,STAD,LIHC,CESC,OV,UCEC,BRCA,SKCM,HNSC,THCA	0.639	0.358
ENSG00000251562	MALAT1	ENSG00000173473	SMARCC1	ENSG00000176046	NUPR1	-0.752	-0.162	1	0	0	-- -	-0.977	-0.164	pan	LGG,GBM,KICH,KIRC,KIRP,BLCA,PRAD,LUAD,LUSC,COAD,READ,STAD,LIHC,CESC,OV,UCEC,BRCA,SKCM,HNSC,THCA	0.593	0.702
ENSG00000251562	MALAT1	ENSG00000185591	SP1	ENSG00000075407	ZNF37A	0.49	-0.0534	0.995	0	0	+ -	0.537	-0.0535	pan	LGG,GBM,KICH,KIRC,KIRP,BLCA,PRAD,LUAD,LUSC,COAD,READ,STAD,LIHC,CESC,OV,UCEC,BRCA,SKCM,HNSC,THCA	0.326	0.918
ENSG00000251562	MALAT1	ENSG00000185591	SP1	ENSG00000187987	ZSCAN23	0.631	0.171	0.993	0	0	++ +	0.743	0.173	pan	LGG,GBM,KICH,KIRC,KIRP,BLCA,PRAD,LUAD,LUSC,COAD,READ,STAD,LIHC,CESC,OV,UCEC,BRCA,SKCM,HNSC,THCA	0.331	0.891
